# Supplementary material
Source: PubMed Central journal article supplement (PMC7575272)
Supplement: mmc1.pdf [file mmc1.pdf]

# THE LANCET

## Supplementary appendix

This appendix formed part of the original submission. We post it as supplied by the authors.

Supplement to: Stewart R, El-Harakeh A, Cherian SA, on behalf of the LMIC members of COVID-END. Evidence synthesis communities in low-income and middle-income countries and the COVID-19 response. *Lancet* 2020; published online Oct 20. [http://dx.doi.org/10.1016/S0140-6736\(20\)32141-3](http://dx.doi.org/10.1016/S0140-6736(20)32141-3).

LMIC members of COVID-END are: Elie A Akl (Department of Internal Medicine, American University of Beirut, Beirut, Lebanon), Zhenggang Bai (Evidence-based Research Center of Social Science and Health, Nanjing University of Science and Technology, Nanjing, China), Jorge Barreto (Oswaldo Cruz Foundation (FIOCRUZ), Rio de Janeiro, Brazil), Sunu Alice Cherian (Pushpagiri Centre for Evidence-Based Practice, Thiruvalla, India), Kamga Emmanuel Berinyuy (Effective Basic Services (eBASE) Africa, Bamenda, Cameroon), Amena El-Harakeh (Knowledge to Policy Center, SPARK, American University of Beirut, Beirut, Lebanon), Fadi El-Jardali (Knowledge to Policy Center, SPARK, American University of Beirut, Beirut, Lebanon), Ivan D Florez (McMaster University, Hamilton, Canada), Edward Kayongo (Africa Centre for Rapid Evidence Synthesis, Makerere University, Kampala, Uganda), Ismael Kawooya (Africa Centre for Rapid Evidence Synthesis, Makerere University, Kampala, Uganda), Tamara Kredo (Cochrane South Africa, South African Medical Research Council, Cape Town, South Africa), Laurenz Langer (Africa Centre for Evidence, University of Johannesburg, Johannesburg, South Africa), Tamara Lotfi (Global Evidence Synthesis Initiative, Beirut, Lebanon), Michael McCaul (Centre for Evidence-based Health Care, Stellenbosch University, Stellenbosch, South Africa), Rhona Mijumbi (Africa Centre for Rapid Evidence Synthesis, Makerere University, Kampala, Uganda), Lucy Shantel Nakibuuka (Faculty of Medicine, Memorial University of Newfoundland, St John's, Canada), Eve Namisango (Africa Centre for Systematic Reviews and Knowledge Translation, Makerere University, Kampala, Uganda), Regina Ndagire (Africa Centre for Systematic Reviews and Knowledge Translation, Makerere University, Kampala, Uganda), Promise Nduku (Africa Centre for Evidence, University of Johannesburg, Johannesburg, South Africa), Ekwaro Obuku (Africa Centre for Systematic Reviews and Knowledge Translation, Makerere University, Kampala, Uganda), Moses Ocan (Africa Centre for Systematic Reviews and Knowledge Translation, Makerere University, Kampala, Uganda), Patrick Okwen Mbah (Effective Basic Services (eBASE) Africa, Bamenda, Cameroon), Cheow Peng Ooi (Faculty of Medicine and Health Sciences, Universiti Putra Malaysia, Malaysia), Daniel F Patino (University of Antioquia, Medellin, Colombia), Gabriel Rada (Epistemonikos Foundation, Santiago, Chile), Ludovic Reveiz (Evidence and Intelligence for Action in Health Department, Pan American Health Organization), Ruth Stewart (Africa Centre for Evidence, University of Johannesburg, Johannesburg, South Africa), Rachel Nante Wangi (Africa Centre for Systematic Reviews and Knowledge Translation, Makerere University, Kampala, Uganda), Charles S Wiysonge (Cochrane South Africa, South African Medical Research Council, Cape Town, South Africa), Taryn Young (Centre for Evidence-Based Health Care, Stellenbosch University, Stellenbosch, South Africa), Xuan Yu (Evidence-Based Medicine Centre, Lanzhou University, Lanzhou, China), and Ying Zhu (Evidence-Based Medicine Centre, Lanzhou University, Lanzhou, China).
